# Supplementary material
Source: bioRxiv or medRxiv preprint supplement (http://www.biorxiv.org/highwire/filestream/47411/field_highwire_adjunct_files/0/141689-1.pdf)
Supplement: Supplementary file [file 141689-1.pdf]

1 **Supplementary Notes for “Nucleus specific expression in the**  
2 **multinucleated mushroom *Agaricus bisporus* reveals different nuclear**  
3 **regulatory programs”**

4 Thies Gehrman, Jordi F. Pelkmans, Robin A. Ohm, Aurin M. Vos, Anton S.M. Sonnenberg, Johan J.P.  
5 Baars, Han A. B. Wösten, Marcel J. T. Reinders, Thomas Abeel

6 **Supplementary note A: The number of markers per karyollele pair**  
7 **can be asymmetric**

8 Most karyollele pairs have the same number of markers per karyollele. This is illustrated by large  
9 points along the diagonal of figure SF.A.1. However, some markers have different numbers of  
10 markers. Figure SF.A.2 illustrates an example of how this asymmetry occurs due to differences in the  
11 variant boundaries. Furthermore, asymmetry can also be introduced by duplication events which  
12 make markers non-unique across the rest of the genome, or even domain sequences with a  
13 mutation in one homokaryon, but not in the other.

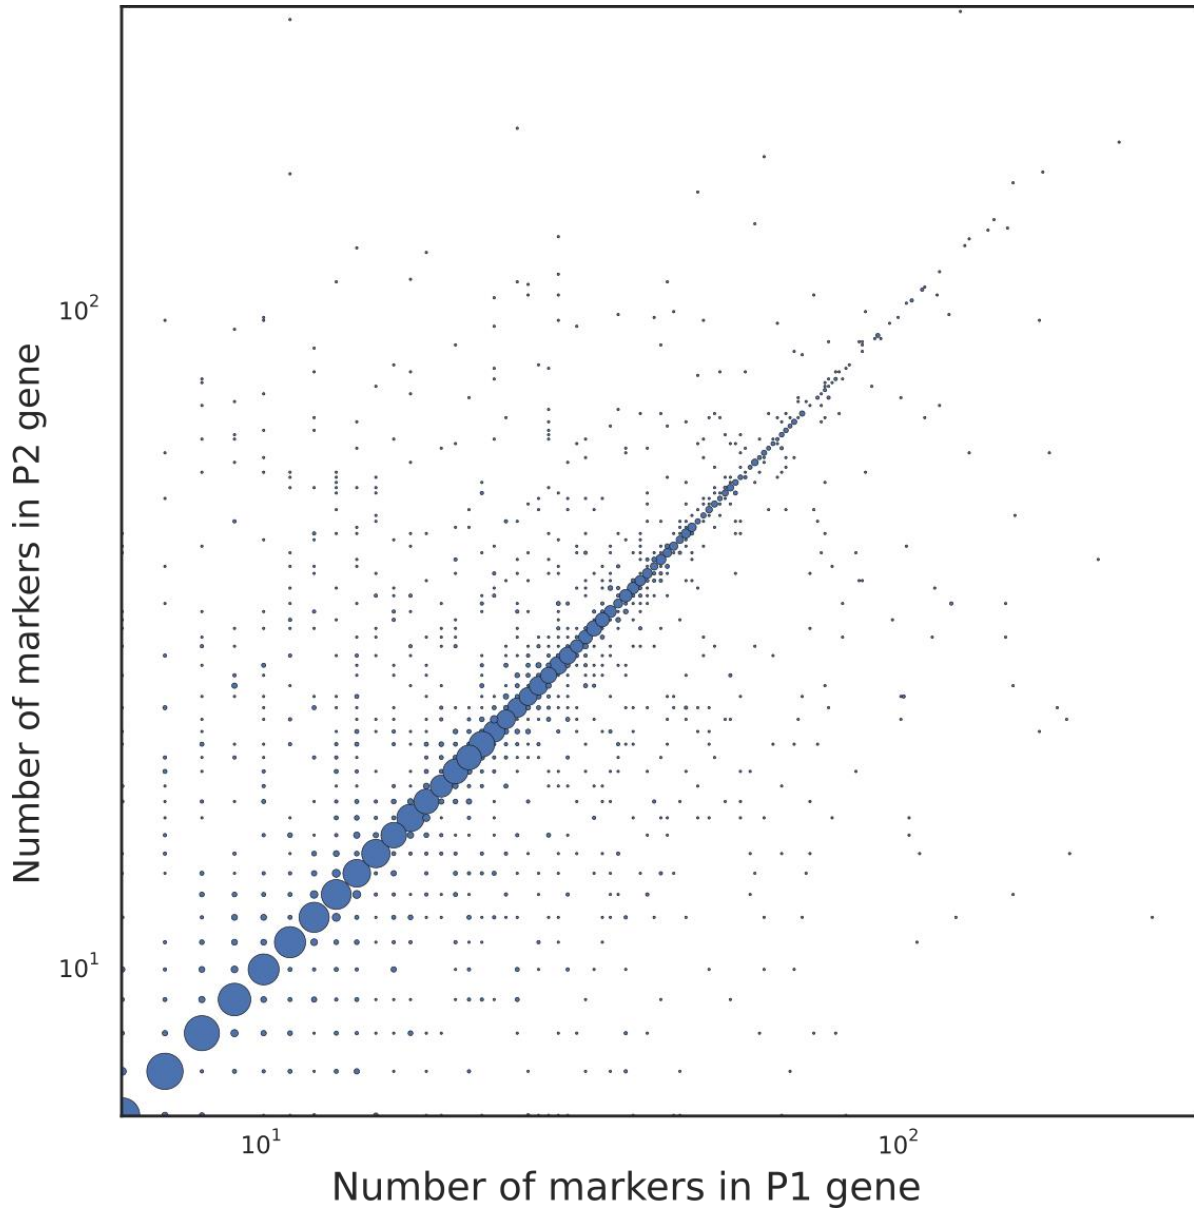

14

15 **Figure SF.A.1: The number of karyollele pairs with a given number of markers. On the x-axis and y-axis is given the**  
16 **number of markers discovered in P1, and P2 respectively. The size of a point represents the number of karyollele pairs**  
17 **with that number of markers per homokaryon.**

18

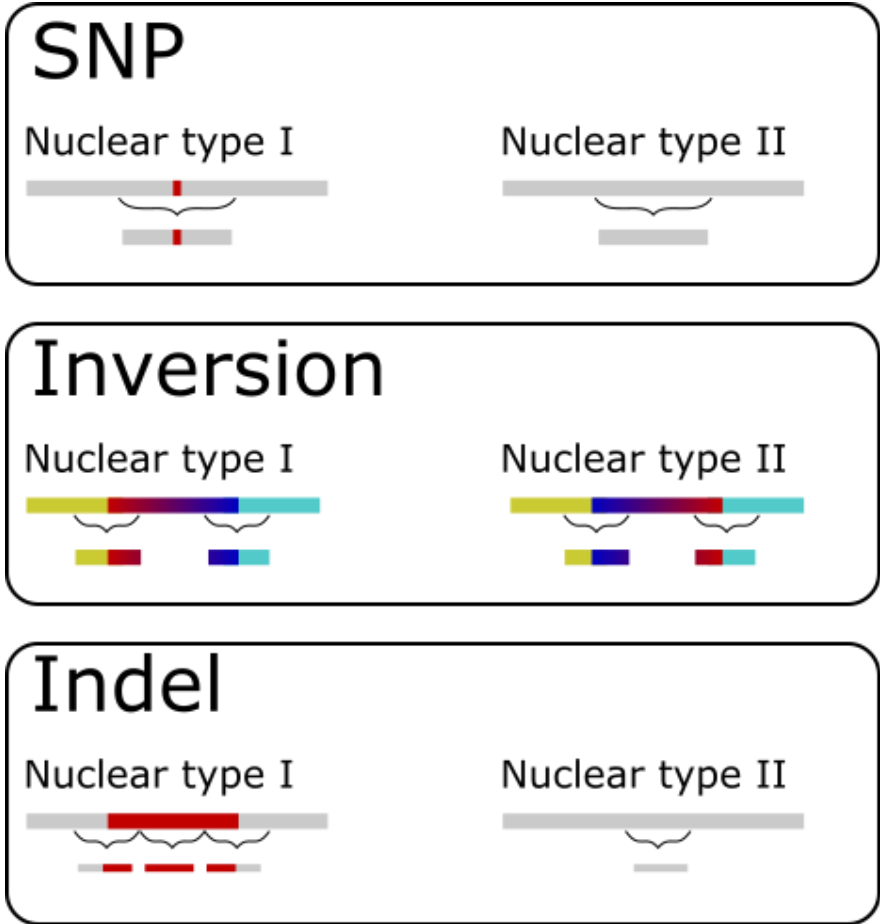

19

20

21

22

23

Figure SF.A.2: Different variants cause different marker counts per nuclear type. SNPs and inversions will result in an equal number of markers per nuclear type, whereas an indel can result in many more, due to the increased number of variant boundaries, and the novel sequence introduced.

24 **Supplementary Note B: Compost read ratio chromosome expression**  
25 **heatmap**

26 Figure SF.B.1 shows the Chromosome Read Ratio (CRR) measurements in compost. Notice that the  
27 scale of figure SF.B.1 is different from figures 2, 3 and 4 in the main text, but the same as SF.G.1.

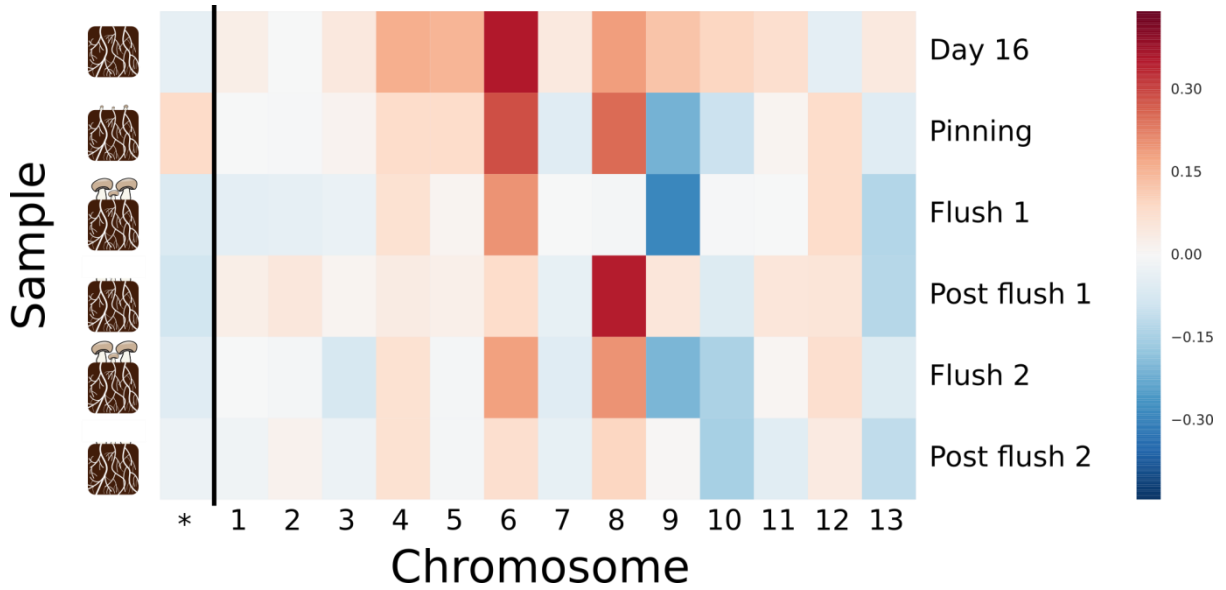

28

29 **Figure SF.B.1: Compost CRR measurements for each timepoint and chromosome. The first column provides the TRR**  
30 **measurements across all chromosomes. Red indicates a higher contribution of P1, and blue indicates a higher**  
31 **contribution of P2.**

32

33

34 **Supplementary Note C: Differences in CG content is not correlated to**  
35 **differences in expression**

36 Figure SF.C.1 shows the relationship between CG content and karyollele expression. For each  
37 karyollele pair, we calculate the average CG content and the average expression across all markers  
38 for each karyollele. We calculate the difference between CG contents. Additionally, the difference in  
39 read depth and normalize it to lie within [1,-1] (1 represents an entirely P1 expressed karyollele, and  
40 -1 an entirely P2 expressed karyollele, 0 represents equal expression). The difference in karyollele  
41 expression and CG content of its markers is not correlated ( $p=0.05$ )

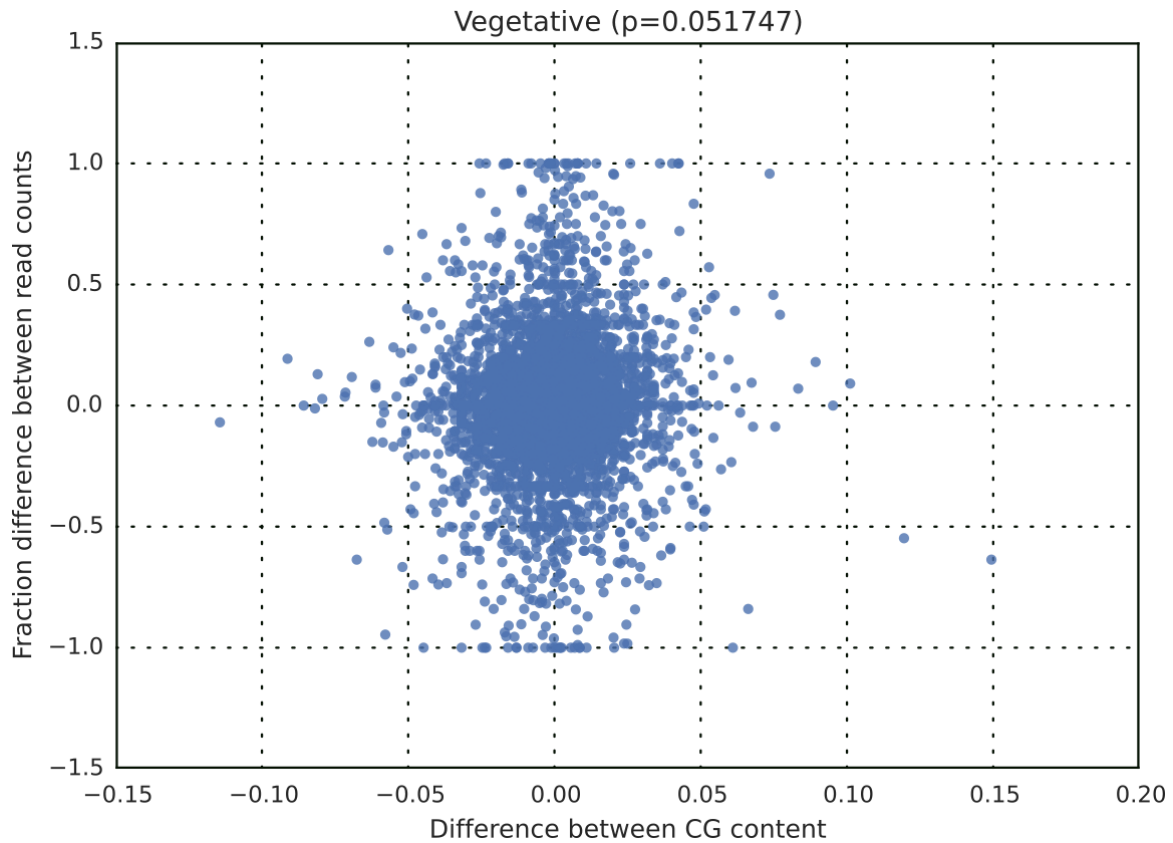

42

43 **Figure SF.C.1: Relationship between the difference in gene expression between karyollele pairs (y-axis) and average**  
44 **marker CG content per karyollele (x-axis). The average expression and average CG content of markers do not seem to be**  
45 **related. Here shown only for the vegetative stage in the mushroom dataset; Other samples show the same behaviour.**

46

47 **Supplementary Note D: PCA plots of tissue and compost samples**

48 For each sample, we construct two vectors of size 5,060, describing the expression of each karyollele  
 49 in P1 and P2, respectively. With this, we perform a PCA to observe the relationships between the  
 50 different samples and nuclear types. Figure SF.D.1 shows a divergence of P1 (shown in red) and P2  
 51 (shown in blue) expression measurements in mushroom samples, indicating that P1 homokaryons  
 52 are more similar to P1 homokaryons than to any P2 homokaryon, and vice versa. Figure SF.D.2  
 53 shows the same for compost data.

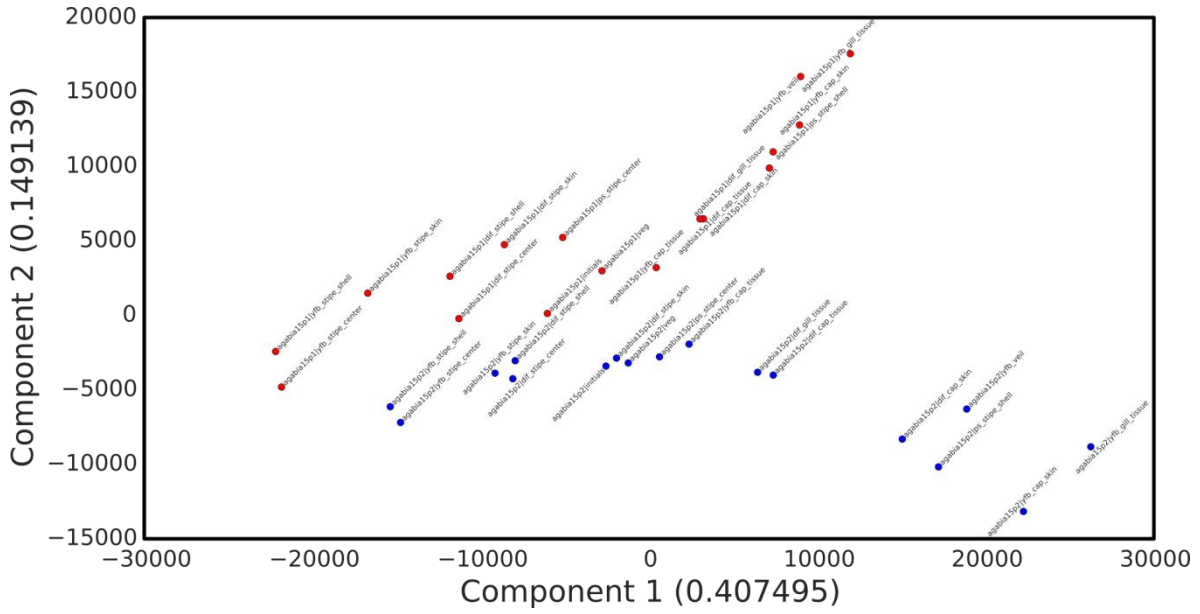

54  
 55 **Figure SF.D.1: PCA dimensionality reduction of karyollele expression data. The first and second components are plotted**  
 56 **on the X and Y axes, respectively. P1 homokaryon samples are shown in red, and P2 homokaryons are shown in blue.**

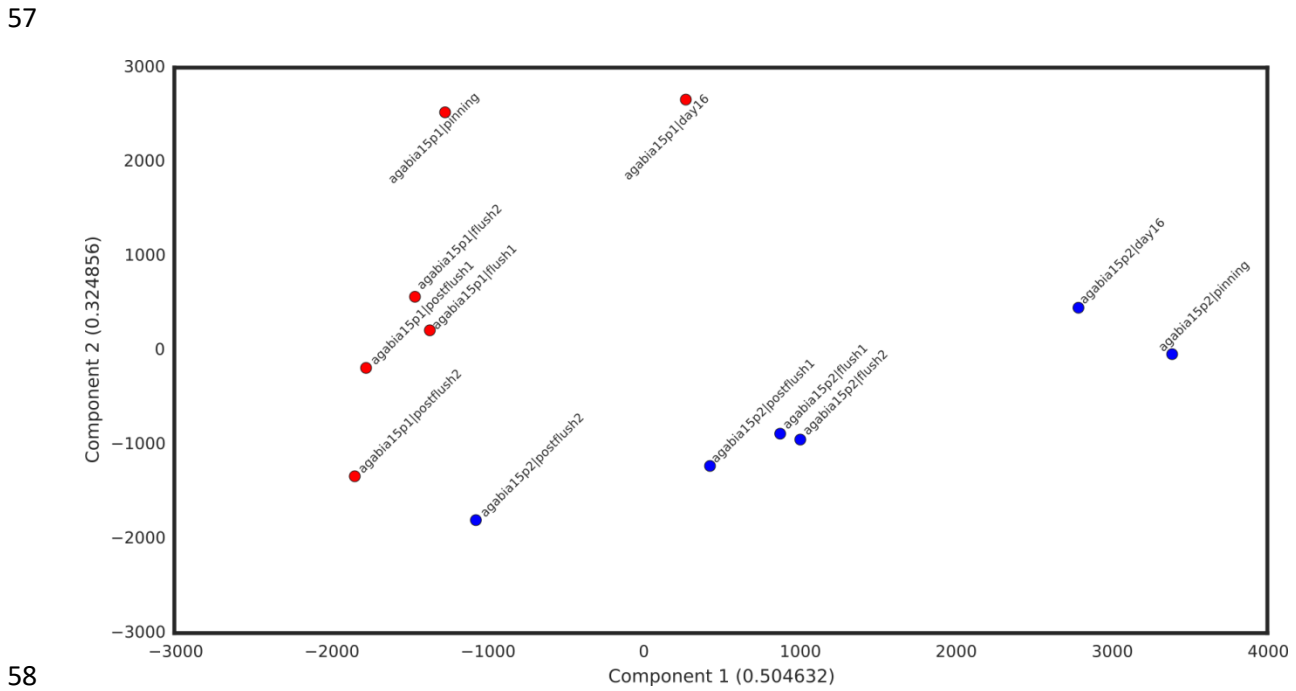

58  
 59 **Figure SF.D.2: The first and second components of a PCA are shown on the X and Y axes, respectively for compost data.**

## 60 **Supplementary Note E: Bias of extreme genes**

61 Figure SF.E.1 shows the influence of highly expressed genes on the Chromosome Read Ratio (CRR  
62 measure). We sort the genes on each chromosome based on the sum of their expression in the two  
63 nuclear types. Sorting the genes by their expression (lowest to highest), and starting with the lowest  
64 expressed gene, we calculate the CRR and CGR (Equations 4 and 6, respectively) ratios per  
65 chromosome, for increasingly larger sets of genes. We see that the CRR (red line) considerably  
66 changes once we consider highly expressed genes. The CGR (black line) is more stable towards highly

67 expressed genes.

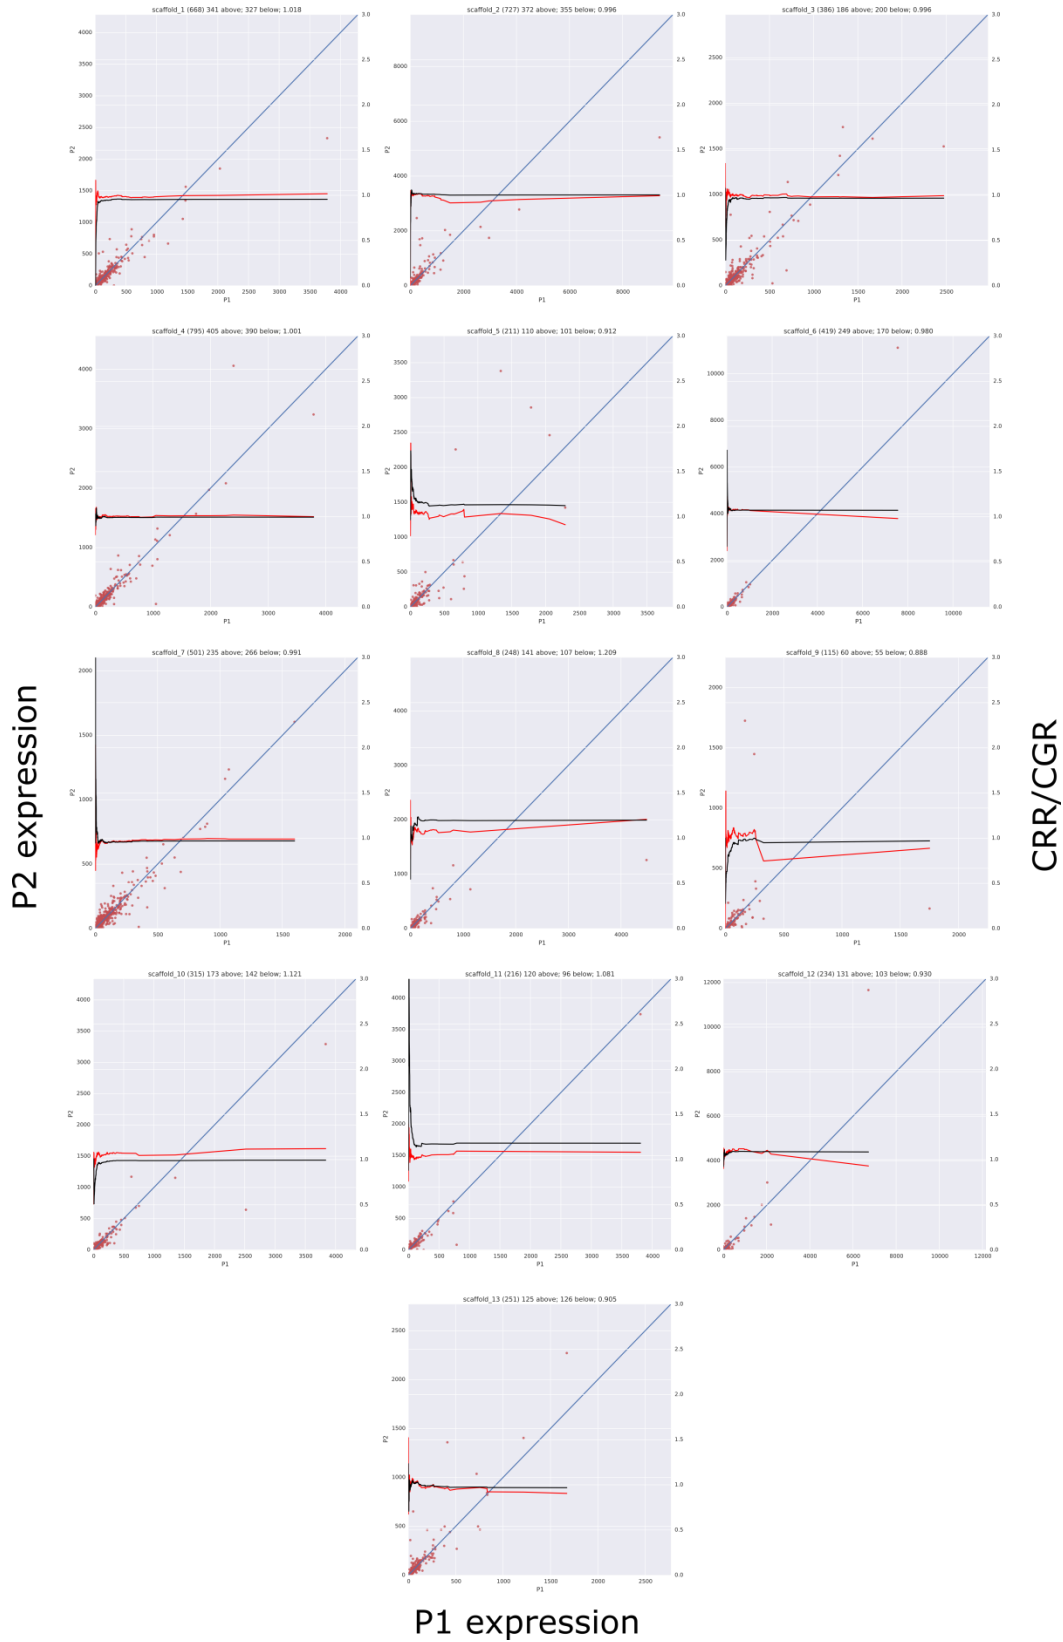

68

69 **Figure SF.E.1: The bias of highly expressed genes. X-axis represents P1 expression, and Y-axis represents P2 expression.**  
70 **The red points represent the genes on each chromosome and their expression values in the P1 and P2 nuclear types. The**  
71 **blue line is the identity line; points on or near this line have near-identical expression. The red and black lines are the**  
72 **CRR and the CGR, with a separate y-axis on the right hand side, calculated by continuously considering the next most**



73 highly expressed gene. Read ratio is very affected by the highest expressed genes. Each chromosome is plotted  
74 individually.

## 75 **Supplementary Note F: Extreme genes**

76 In Figure 3, we showed that more mRNA originates from P2 in the case of, for example, chromosome  
77 9 than from P1. This was in part due to a few genes which were very highly expressed. These highly  
78 expressed genes skew the read count ratios (see Supplementary Material Note E). The differences  
79 can be quite extreme; In one case, a P1 karyotype accounted for <1% of all reads originating from  
80 chromosome 9, while its P2 karyotype accounted for 21% of all the chromosome 9 reads. Hence,  
81 most of the observed differences for chromosome 9 (Figure 3) is explained by such highly expressed  
82 genes.

83 In total, we identified 22 genes whose contribution exceeds 10% of the total expression of the  
84 chromosome it is located on. Most of these genes are differentially expressed between the two  
85 nuclear types, with 16 showing fold changes larger than 2. These genes are primarily metabolic.

86 These genes, and their contribution to the CRR scores are provided in data sheet

87 **SupplementaryTable1.xlsx** .

88 **Supplementary note G: Nuclear type Gene Ratio (NGR) measures in**  
89 **the mushroom dataset**

90 Figure SF.G.1 shows the Nuclear type Gene Ratio measures for the mushroom dataset. It becomes  
91 clear that on average, the P1 nuclear type is dominant over the P2 nuclear type. This is statistically  
92 significant (the log-transformed chromosome gene ratios are significantly  $> 0$ , following a t-test in  
93 mushroom tissue, with  $p < 0.01$ ).

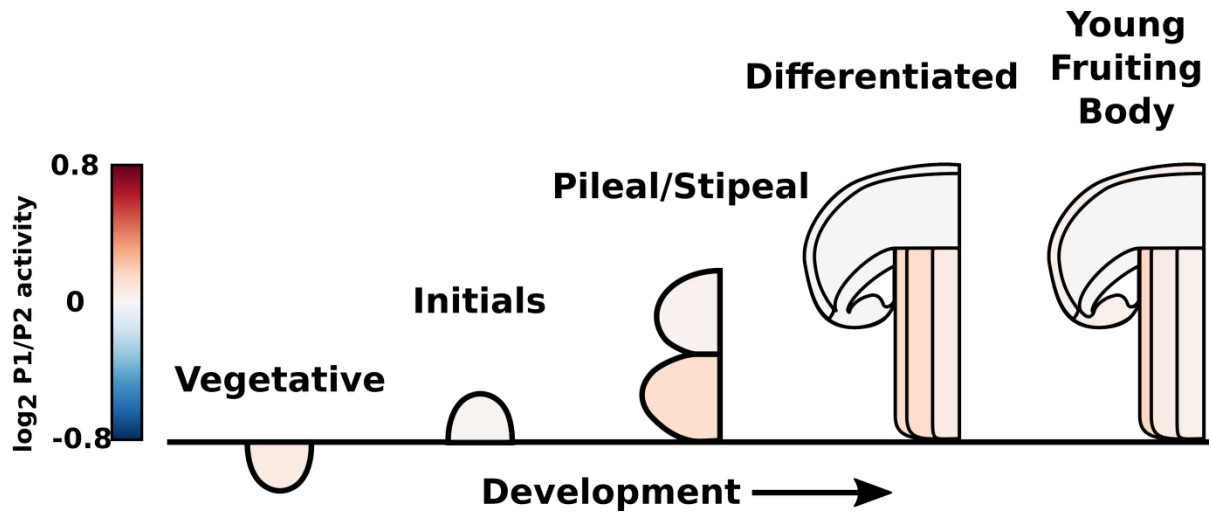

94

95 Figure SF.G.1: The Nuclear type Gene Ratio measures in the mushroom dataset.

96 **Supplementary Note H: Compost gene ratio chromosome expression**  
 97 **heatmap**

98 Figure SF.H.1 shows the Chromosome Gene Ratio measurements of each chromosome and tissue in  
 99 the compost data. Also here it is seen that the P1 homokaryon produces more mRNA per gene on  
 100 average, but it is not significantly dominant. Notice that the scale of figure SF.H.1 is different from  
 101 figures 2, 3 and 4 in the main text (but the same as SF.C.1).

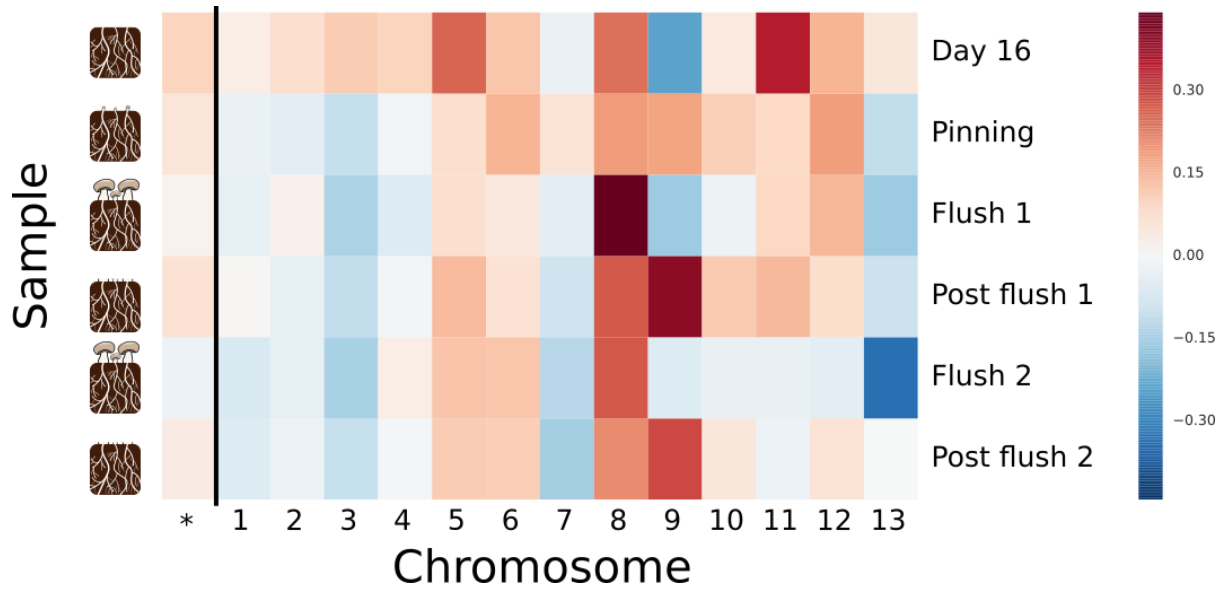

102

103 **Figure SF.H.1: The Chromosome Read Gene Ratio measures for each chromosome and tissue in the compost data. Red**  
 104 **indicates a higher contribution of P1, and blue indicates a higher contribution of P2.**

105

106 **Supplementary Note I: Methylation**

107 To investigate the biological mechanism causing differential expression, we measured methylation  
 108 on the A15 genome. Assuming that the relative Cytosine/Thymine coverage at each base relates to  
 109 a differential methylation state between the two nuclear types, we conclude that 277 genes are  
 110 differentially methylated (Methods). 42 of these 277 genes were also found to be differentially  
 111 expressed between the two nuclear types at some point in development. Although this is a  
 112 significant proportion ( $p < 0.05$ ,  $\chi^2$  test), methylation only explains at most 10% of the differential  
 113 expression we observe. Noteworthy is that 40 of the 42 differentially expressed and differentially  
 114 methylated genes are differentially expressed in mushroom tissues), whereas only 9 are  
 115 differentially expressed in the vegetative mycelium. This indicates that the largest impact of  
 116 differential methylation is much later in mushroom development, suggesting that methylation has a  
 117 delayed effect on expression.

118 Table ST.I.1 shows these overlaps for the different sets of differentially expressed genes. We find  
 119 that the methylated genes overlap mostly with the genes which are differentially expressed in the  
 120 mushroom data.

121 **Table ST.I.1: Overlap of differentially expressed genes and methylated genes. The p-values of a chi-squared**  
 122 **approximation of the fisher's exact test have been bonferroni corrected (q-values). Significant corrected values have**  
 123 **been highlighted in bold.**

| Set                            | Differentially expressed |                | Not Differentially Expressed |                | p-value   | q-value                 |
|--------------------------------|--------------------------|----------------|------------------------------|----------------|-----------|-------------------------|
|                                | Methylated               | Not Methylated | Methylated                   | Not Methylated |           |                         |
| Vegetative mycelium + Mushroom | 42                       | 369            | 235                          | 4440           | 1.465E-05 | <b><u>8.791E-05</u></b> |
| Vegetative mycelium            | 9                        | 73             | 268                          | 4736           | 4.780E-02 | 2.868E-01               |
| Mushroom                       | 40                       | 328            | 237                          | 4481           | 3.473E-06 | <b><u>2.084E-05</u></b> |
| Overlap                        | 7                        | 32             | 270                          | 4777           | 1.937E-03 | 1.162E-02               |
| Unique Vegetative mycelium     | 2                        | 41             | 275                          | 4768           | 9.150E-01 | 1.000E+00               |
| Unique Mushroom                | 33                       | 296            | 244                          | 4513           | 2.493E-04 | <b><u>1.496E-03</u></b> |

125 **Supplementary Note J: Overlapping differentially expressed genes**  
126 **that changed origin**

127 5 genes changed their differential expression between P1 and P2 between the vegetative mycelium  
128 and the mushroom datasets. These are provided in the additional data sheet:

129 [SupplementaryTable2.xlsx](#) For each karyollele pair, we provide the samples for which the differential  
130 expressions were significant. The blue rows indicate the samples in which they were more highly  
131 expressed by the P2 nuclear type in the vegetative mycelium, and the red rows indicate the samples  
132 in which they were more highly expressed by the P1 nuclear type in the mushroom tissue.

133 **Supplementary Note K: Manganese Peroxidase**

134 Of 90 genes with named annotations in *A. bisporus* (see Methods), 42 are identified as differentiable  
135 karyollele pairs, and one, manganese peroxidase (*mnp1*) was differentially expressed between the  
136 two nuclear types in any stage of development. *mnp1* is known to be highly expressed in early stages  
137 of development, and drops to much lower levels (log fold change of -2.8) after mushroom  
138 formation<sup>2,28</sup>. In our datasets, the individual contributions of P1 and P2 to *mnp1* expression are  
139 largely different. In the vegetative mycelium, we find that P2 produces four-fold more *mnp1*  
140 immediately before mushroom formation than P1 (see Supplementary Material Note K). In the  
141 mushroom tissue, however, *mnp1* is expressed on average 4.2-fold higher by P1 in the stem of the  
142 fruiting body throughout development (see Supplementary Material Note K). Whether this switching  
143 behavior is functionally relevant remains unclear, as two karyolleles of *mnp1* have the same protein  
144 domain annotations in the P1 and P2 homokaryon genomes. The Gene Read Ratio (GRR) in  
145 mushroom tissues is provided in figure SF.K.1, and the total read counts in compost are provided in  
146 figure SF.K.2. Notice that the scale of figure SF.K.1 is different from figures 2, 3 and 4 in the main  
147 text.

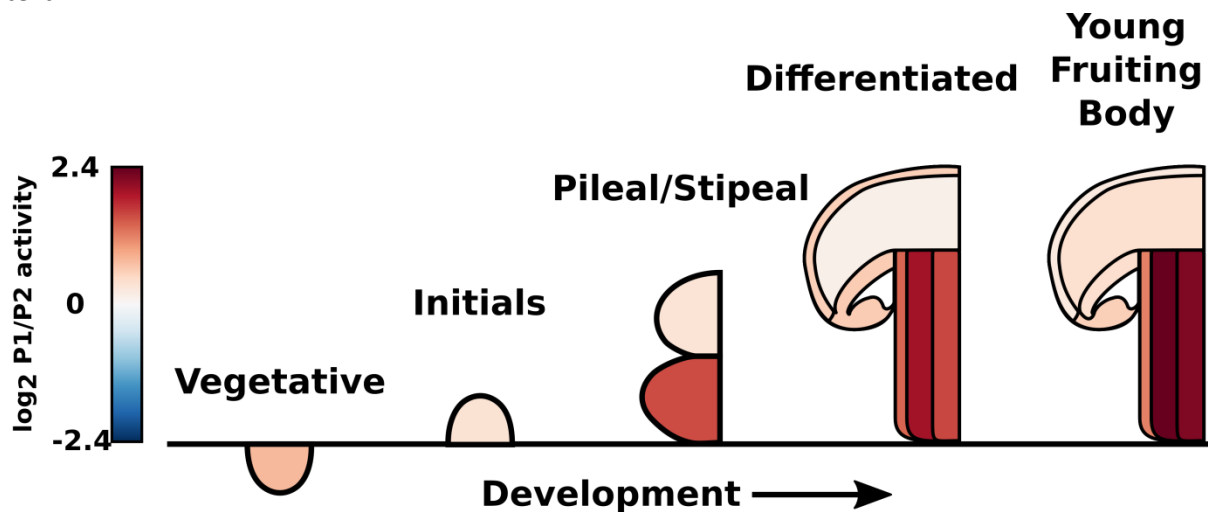

148 Figure SF.K.1: Gene Read Ratios for Manganese Peroxidase in mushroom tissues. Red indicates a  
149 higher contribution of P1, and blue indicates a higher contribution of P2. Expression values range  
150 between [26.2,51.1] in *P1*, and between [9.3,38.2] in *P2*.  
151

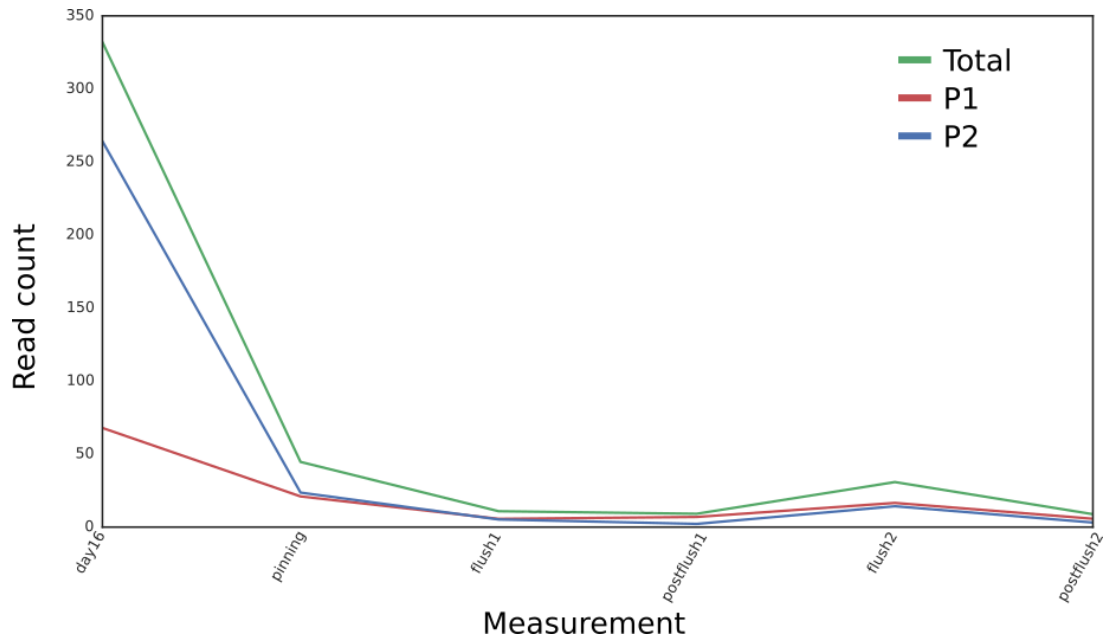

152

153

154

**Figure SF.K.2: Manganese peroxidase expression in the vegetative mycelium dataset. P2 expression is dominant in the vegetative growth of mycelium, but drops shortly after that, in concordance with previous literature [1].**

155

156 **Supplementary Note L: Co-localized, co-regulated clusters**

157 Figure 5 showed the co-localized and co-regulated regions on chromosome 10. In Supplementary  
158 Figures SF.L.1-13, we provide the same figures for the remaining chromosomes. Additionally, in  
159 Supplementary File SupplementaryTable3.xlsx, we provide the exact regions for each dataset.

160

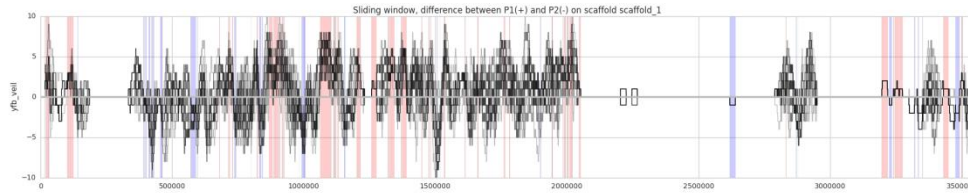

161 **Figure SF.L.1: Equation 8 plotted for all datasets on scaffold 1. Red regions indicate regions of P1 predominance, and**  
162 **blue regions indicate regions of P2 predominance.**

163

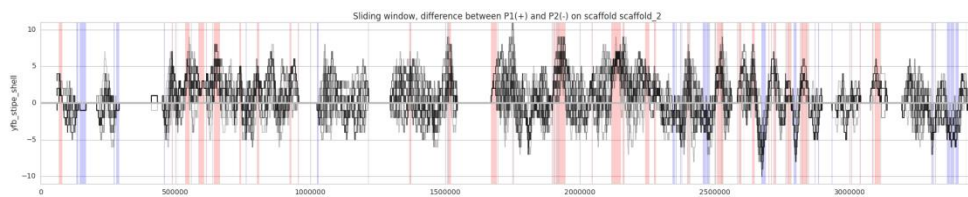

164 **Figure SF.L.2: Equation 8 plotted for all datasets on scaffold 2. Red regions indicate regions of P1 predominance, and**  
165 **blue regions indicate regions of P2 predominance.**

166

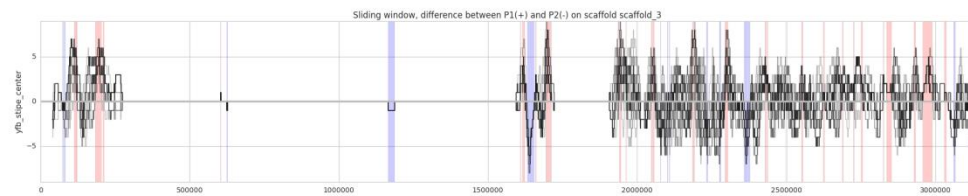

167 **Figure SF.L.3: Equation 8 plotted for all datasets on scaffold 3. Red regions indicate regions of P1 predominance, and**  
168 **blue regions indicate regions of P2 predominance.**

169

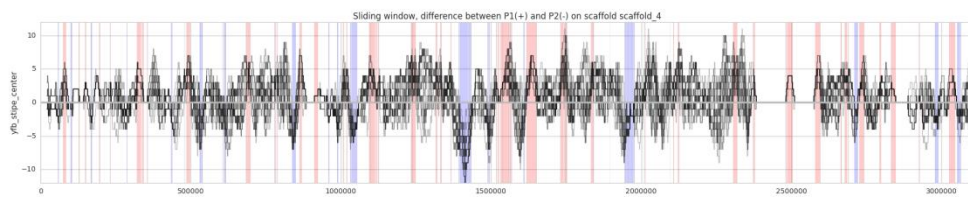

170 **Figure SF.L.4: Equation 8 plotted for all datasets on scaffold 4. Red regions indicate regions of P1 predominance, and**  
171 **blue regions indicate regions of P2 predominance.**

172

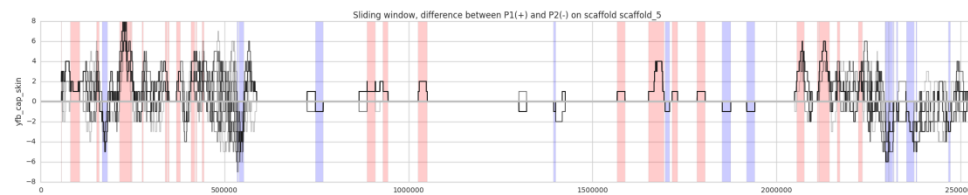



173 **Figure SF.L.5: Equation 8 plotted for all datasets on scaffold 5. Red regions indicate regions of P1 predominance, and**  
174 **blue regions indicate regions of P2 predominance.**

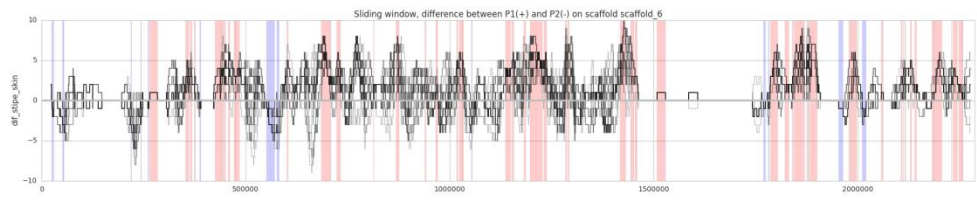

175  
176 **Figure SF.L.6: Equation 8 plotted for all datasets on scaffold 6. Red regions indicate regions of P1 predominance, and**  
177 **blue regions indicate regions of P2 predominance.**

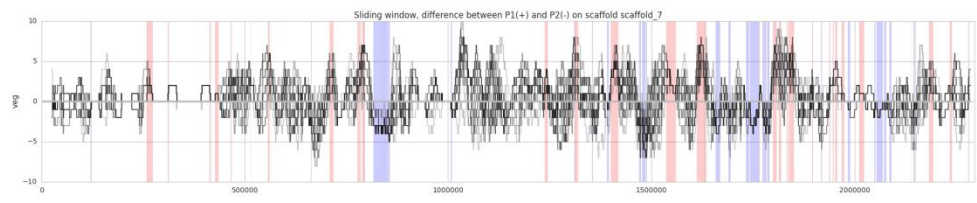

178  
179 **Figure SF.L.7: Equation 8 plotted for all datasets on scaffold 7. Red regions indicate regions of P1 predominance, and**  
180 **blue regions indicate regions of P2 predominance.**

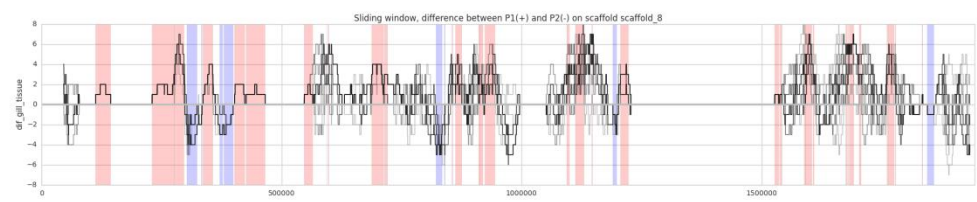

181  
182 **Figure SF.L.8: Equation 8 plotted for all datasets on scaffold 8. Red regions indicate regions of P1 predominance, and**  
183 **blue regions indicate regions of P2 predominance.**

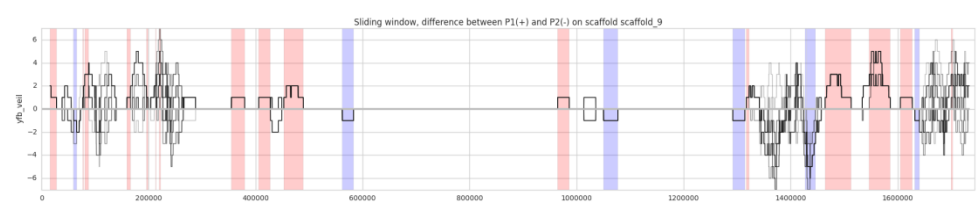

184  
185 **Figure SF.L.9: Equation 8 plotted for all datasets on scaffold 9. Red regions indicate regions of P1 predominance, and**  
186 **blue regions indicate regions of P2 predominance.**

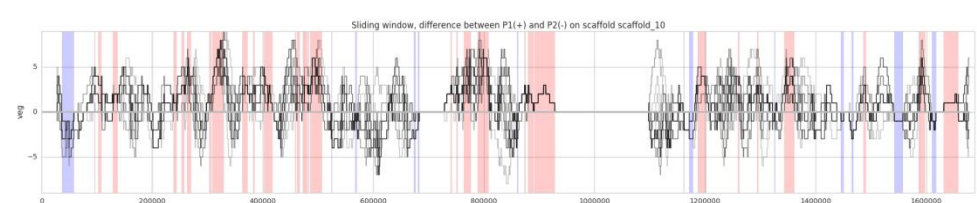

187

188 **Figure SF.L10: Equation 8 plotted for all datasets on scaffold 10. Red regions indicate regions of P1 predominance, and**  
189 **blue regions indicate regions of P2 predominance.**

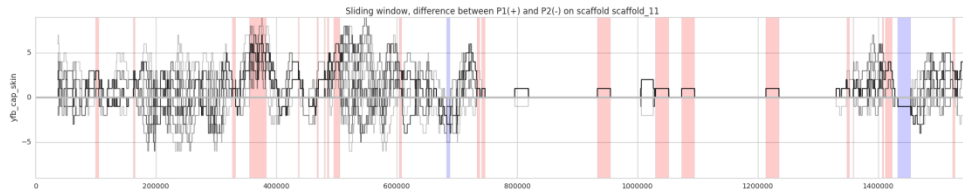

190

191 **Figure SF.L11: Equation 8 plotted for all datasets on scaffold 11. Red regions indicate regions of P1 predominance, and**  
192 **blue regions indicate regions of P2 predominance.**

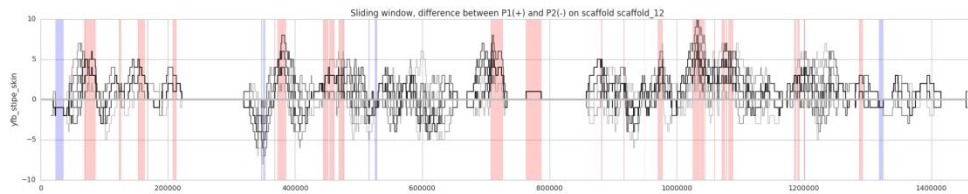

193

194 **Figure SF.L12: Equation 8 plotted for all datasets on scaffold 12. Red regions indicate regions of P1 predominance, and**  
195 **blue regions indicate regions of P2 predominance.**

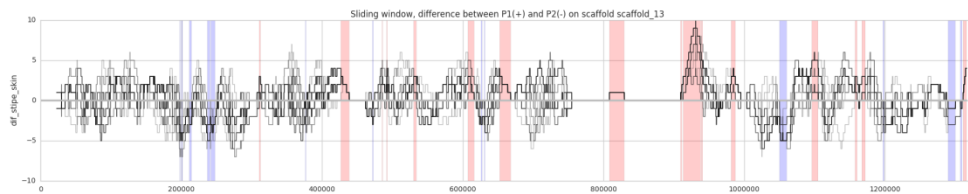

196

197 **Figure SF.L13: Equation 8 plotted for all datasets on scaffold 13. Red regions indicate regions of P1 predominance, and**  
198 **blue regions indicate regions of P2 predominance.**

199

200 **Supplementary Note M: Probability of observing differential**  
 201 **expression imbalance**

202 We can judge the likelihood of observing an imbalance in the number of differentially expressed  
 203 genes on the two homokaryons. For a given time point with x upregulated genes in P1, and y  
 204 upregulated genes in P2, we can determine the probability of observing max(x, y) positive trials  
 205 within x+y trials, under the null hypothesis of there being no difference in chance of a gene being  
 206 upregulated in either homokaryon (i.e. p = 0.5). The probability of observing a value max(x,y) or  
 207 greater can be calculated as 1-P(x < max(x,y)). If this probability is sufficiently small, we may reject  
 208 the underlying assumption that the probability of being upregulated is the same in both  
 209 homokaryons (i.e. p != 0). P-values are corrected by controlling for a 0.05 FDR. The difference was  
 210 only significant in some vegetative growth time points, shown underlined in ST.M.1.

211 **Table ST.M.1: The number of differentially expressed genes that are more highly expressed in P1 or P2 in each different**  
 212 **sample, together with the significance of this difference**

| condition                | Up in P1 | Up in P2 | pvalue   | qvalue          |
|--------------------------|----------|----------|----------|-----------------|
| Day 16                   | 11       | 29       | 0.001111 | <u>0.027768</u> |
| Flush 1                  | 14       | 32       | 0.002267 | <u>0.028337</u> |
| Total vegetative dataset | 30       | 52       | 0.005319 | <u>0.044323</u> |
| Pinning                  | 14       | 29       | 0.006859 | <u>0.044323</u> |
| Flush 2                  | 20       | 32       | 0.035197 | 0.148658        |
| Post Flush 2             | 18       | 30       | 0.029732 | 0.148658        |
| Post Flush 1             | 14       | 24       | 0.036476 | 0.148658        |
| YFB Stipe Center         | 72       | 86       | 0.116317 | 0.363492        |
| Initials                 | 58       | 50       | 0.193286 | 0.487041        |
| Total Mushroom dataset   | 176      | 192      | 0.18777  | 0.487041        |
| YFB Cap Tissue           | 91       | 103      | 0.175335 | 0.487041        |
| PS Stipe Shell           | 63       | 54       | 0.17764  | 0.487041        |
| Dif. Stipe skin          | 75       | 80       | 0.314999 | 0.504822        |
| Dif. Cap Skin            | 58       | 60       | 0.391278 | 0.504822        |
| YFB Veil                 | 72       | 70       | 0.40067  | 0.504822        |
| YFB Cap Skin             | 89       | 82       | 0.270406 | 0.504822        |
| Dif. Cap Skin            | 63       | 61       | 0.393873 | 0.504822        |
| Dif. Gill Tissue         | 60       | 59       | 0.427315 | 0.504822        |
| Dif. Stipe Center        | 87       | 83       | 0.350741 | 0.504822        |
| Dif. Stipe Shell         | 86       | 90       | 0.353185 | 0.504822        |
| YFB Gill Tissue          | 69       | 65       | 0.332975 | 0.504822        |
| YFB Stipe Skin           | 94       | 94       | 0.470943 | 0.504822        |
| PS Stipe Center          | 71       | 77       | 0.282586 | 0.504822        |
| Vegetative               | 47       | 42       | 0.262507 | 0.504822        |
| YFB Stipe Shell          | 93       | 92       | 0.441575 | 0.504822        |

213

214

215 **Supplementary Note N: KEGG pathways with differentially expressed**  
 216 **genes**

217 We overlay the differentially expressed genes on KEGG pathways using KAAS pipeline [2]. Table  
 218 ST.N.1 shows the pathways which contained differentially expressed genes, together with the genes  
 219 we identify.

220 **Table ST.N.1: KEGG pathways with differentially expressed genes.**

| Pathway ID | Pathway                                                                         | P1 Upregulated                                                               | P2 Upregulated                         |
|------------|---------------------------------------------------------------------------------|------------------------------------------------------------------------------|----------------------------------------|
| M00360     | Aminoacyl-tRNA biosynthesis, prokaryotes                                        | AgabiA15p1   1761, AgabiA15p2   1770<br>AgabiA15p1   2808, AgabiA15p2   2763 | AgabiA15p1   660, AgabiA15p2   686     |
| M00359     | Aminoacyl-tRNA biosynthesis, eukaryotes                                         | AgabiA15p1   1761, AgabiA15p2   1770<br>AgabiA15p1   2808, AgabiA15p2   2763 | AgabiA15p1   660, AgabiA15p2   686     |
| M00074     | N-glycan biosynthesis, high-mannose type                                        | AgabiA15p1   10048, AgabiA15p2   10102                                       | AgabiA15p1   10047, AgabiA15p2   10101 |
| M00073     | N-glycan precursor trimming                                                     | AgabiA15p1   10048, AgabiA15p2   10102                                       | AgabiA15p1   10047, AgabiA15p2   10101 |
| M00009     | Citrate cycle (TCA cycle, Krebs cycle)                                          | AgabiA15p1   2884, AgabiA15p2   2813                                         |                                        |
| M00121     | Heme biosynthesis, glutamate => protoheme/siroheme                              | AgabiA15p1   4282, AgabiA15p2   4299                                         |                                        |
| M00173     | Reductive citrate cycle (Arnon-Buchanan cycle)                                  | AgabiA15p1   2884, AgabiA15p2   2813                                         |                                        |
| M00172     | C4-dicarboxylic acid cycle, NADP - malic enzyme type                            |                                                                              | AgabiA15p1   9348, AgabiA15p2   9524   |
| M00395     | Decapping complex                                                               |                                                                              | AgabiA15p1   10082, AgabiA15p2   10134 |
| M00179     | Ribosome, archaea                                                               |                                                                              | AgabiA15p1   9326, AgabiA15p2   9502   |
| M00035     | Methionine degradation                                                          | AgabiA15p1   8424, AgabiA15p2   8562                                         |                                        |
| M00010     | Citrate cycle, first carbon oxidation, oxaloacetate => 2-oxoglutarate           | AgabiA15p1   2884, AgabiA15p2   2813                                         |                                        |
| M00293     | DNA polymerase zeta complex                                                     | AgabiA15p1   615, AgabiA15p2   7069                                          |                                        |
| M00079     | Keratan sulfate degradation                                                     |                                                                              | AgabiA15p1   9068, AgabiA15p2   9247   |
| M00740     | Methylaspartate cycle                                                           | AgabiA15p1   2884, AgabiA15p2   2813                                         |                                        |
| M00042     | Catecholamine biosynthesis, tyrosine => dopamine => noradrenaline => adrenaline | AgabiA15p1   7887, AgabiA15p2   8061                                         |                                        |
| M00128     | Ubiquinone biosynthesis, eukaryotes, 4-hydroxybenzoate => ubiquinone            |                                                                              | AgabiA15p1   2051, AgabiA15p2   2031   |
| M00338     | Cysteine biosynthesis, homocysteine + serine => cysteine                        | AgabiA15p1   8424, AgabiA15p2   8562                                         |                                        |
| M00169     | CAM (Crassulacean acid metabolism), light                                       |                                                                              | AgabiA15p1   9348, AgabiA15p2   9524   |
| M00178     | Ribosome, bacteria                                                              |                                                                              | AgabiA15p1   9326, AgabiA15p2   9502   |
| M00295     | BRCA1-associated genome surveillance complex (BASC)                             | AgabiA15p1   1458, AgabiA15p2   1537                                         |                                        |
| M00012     | Glyoxylate cycle                                                                | AgabiA15p1   2884, AgabiA15p2   2813                                         |                                        |

222 **Supplementary Note O: Differential protein domain annotations**

223 Figure SF.O.1 shows the number of karyollele pairs in which karyollele pairs exhibit different protein  
 224 domain annotations. While most (4287) karyollele pairs have the same number of annotations (see  
 225 the diagonal), a few (215) have different protein domain annotations. This is a result of sequence  
 226 differences.

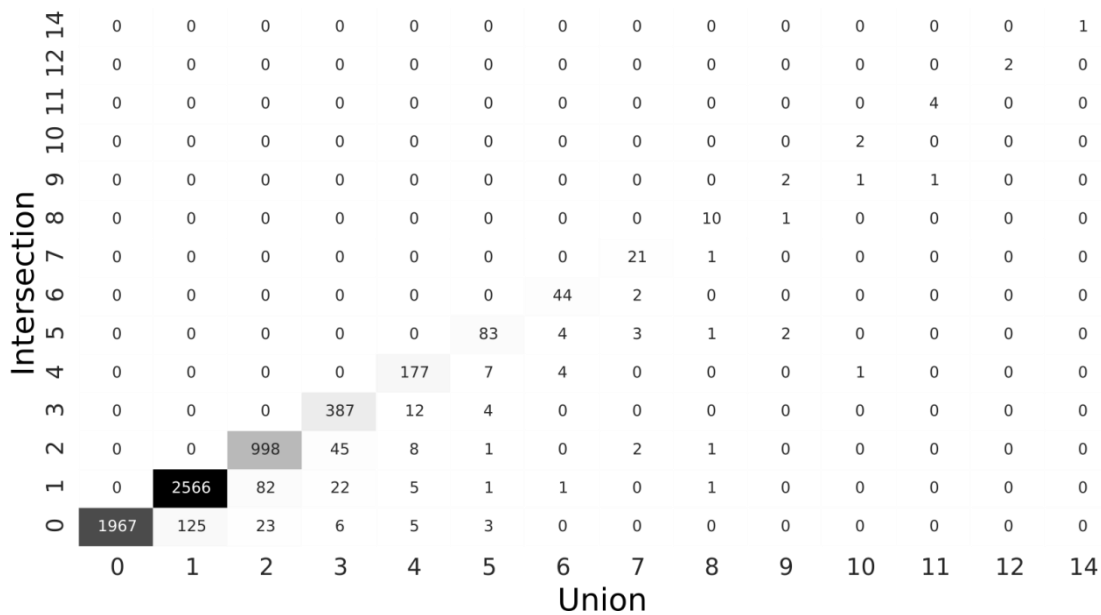

227

228 **Figure SF.O.1: Implications of sequence deviations between karyollele pairs on domain predictions. The number of**  
 229 **unique annotations are given on the x-axis, and the number of annotations in common between the two karyolleles is**  
 230 **given on the y-axis. If the numbers are not equal, that means that both karyolleles are not annotated with the same**  
 231 **domains. In the corresponding cells are given the number of genes with this combination of annotations. Most genes do**  
 232 **not exhibit alternative functionality (see diagonal), but quite a number do (see below the diagonal).**

233 **Supplementary Note P: PCR duplicates**

234 PCR duplicates in mushroom tissues dataset and the vegetative mycelium dataset. We find a large  
235 amount of PCR duplication in the compost data. See SupplementaryTable.xlsx, where we provide the  
236 original read counts for each sample, the reads which remain after PCR duplicate removal, and the  
237 percent removed and remaining. We find that the vegetative mycelium dataset contains upwards of  
238 50% PCR duplicates.

239 **Supplementary Note Q: Methylation**

240 Figure SF.Q.1 shows the regions on the genome which are differentially methylated in green. These  
241 mostly overlap with regions that are represented by repetitive elements (Sonnenberg et al. 2016),  
242 where we cannot distinguish genes based in sequence. In Figure SF.Q.2, we show the fraction of  
243 methylated and unmethylated cytosines for a given base. This figure is indicative of an organism  
244 with mixed methylation statuses, which is to be expected in our case.

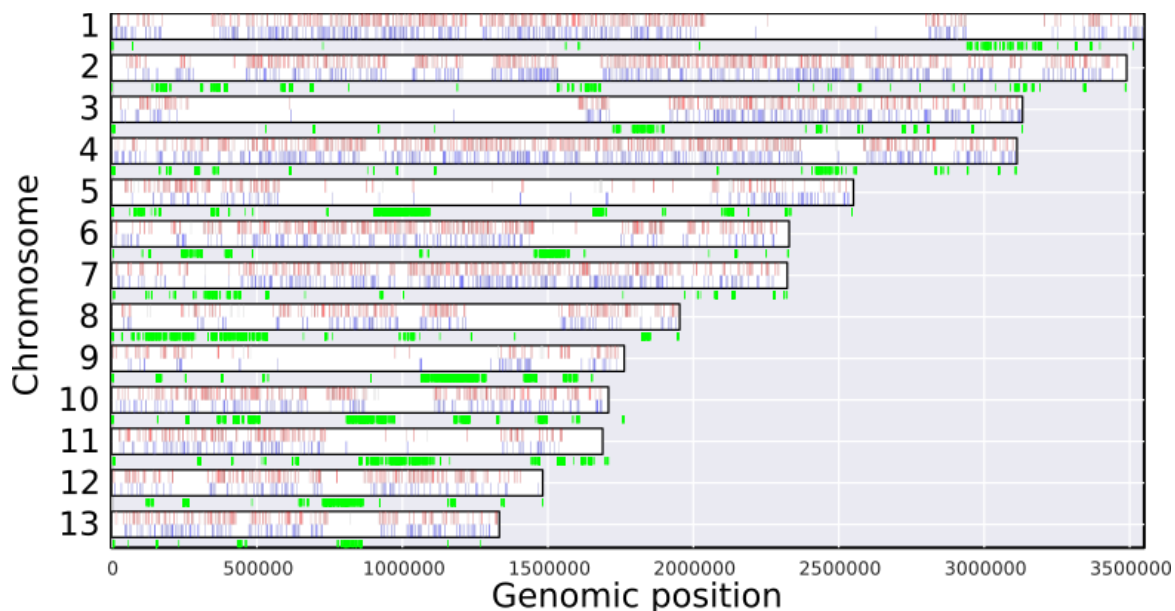

245  
246 **Figure SF.Q.1: Differentially methylated bases in the A15 genome. As in figure 4 of the main text, the red and blue marks**  
247 **indicate genes with upregulation in the P1 and P2 homokaryons, respectively. The green marks indicate bases which are**  
248 **methylated at that point.**

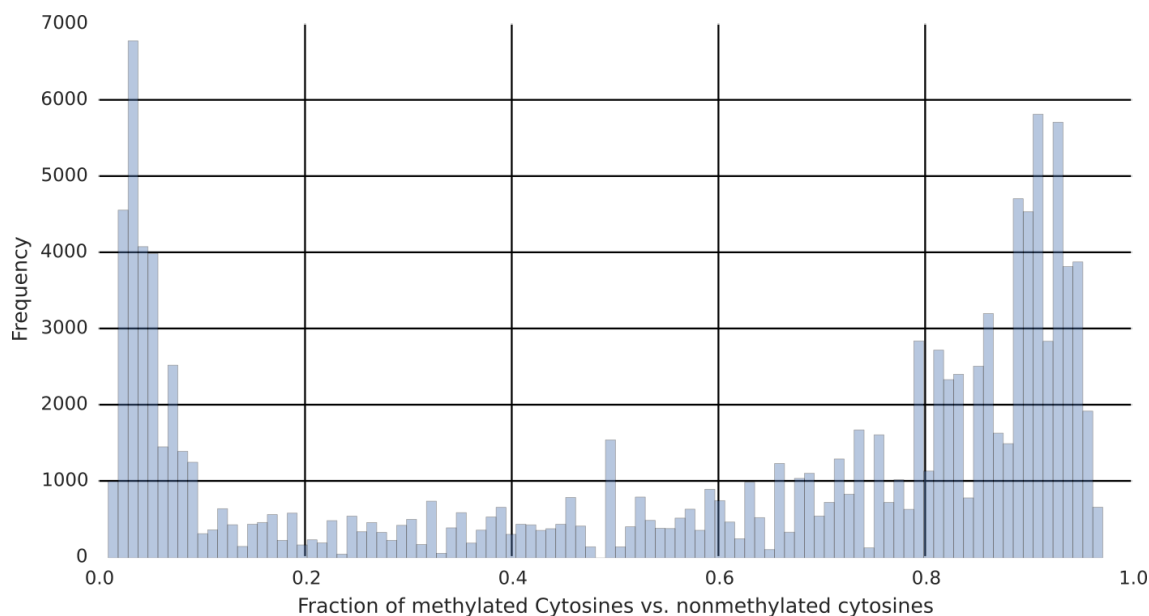

249  
250 **Figure SF.Q.2: Frequency distribution of methylated vs. non methylated cytosines.**

251

252 **Supplementary Note R: Named genes in *Agaricus bisporus* v. 2**

253 We mapped all transcripts from agabi2 to transcripts P1 with a bidirectional best nucleotide blast  
 254 hit. In one case there was an ambiguous mapping, and we selected the mapping with the highest  
 255 percent sequence identity (the e-values were identical). Table ST.R.1 provides these named genes,  
 256 together with their mapping values.

257 **Table ST.R.1: Named genes in version 2, and their corresponding karyollele pairs in A15.**

| P1               | P2               | agabi2 | name    | value     | pident |
|------------------|------------------|--------|---------|-----------|--------|
| AgabiA15p1 9363  | AgabiA15p2 9538  | 152135 | AOX     | 0         | 98.69  |
| AgabiA15p1 8297  | AgabiA15p2 8431  | 193168 | ATP1    | 0         | 100    |
| AgabiA15p1 3836  | AgabiA15p2 3811  | 192355 | ATP16   | 0         | 99.39  |
| AgabiA15p1 8927  | AgabiA15p2 9066  | 139908 | ATP17   | 3.00E-174 | 98.83  |
| AgabiA15p1 9641  | AgabiA15p2 9823  | 194020 | ATP20   | 0         | 100    |
| AgabiA15p1 2115  | AgabiA15p2 2093  | 194800 | ATP3    | 0         | 100    |
| AgabiA15p1 3238  | AgabiA15p2 3147  | 138704 | ATP4    | 0         | 99.29  |
| AgabiA15p1 6514  | AgabiA15p2 6684  | 135403 | ATP7    | 3.00E-166 | 98.48  |
| AgabiA15p1 5614  | AgabiA15p2 5757  | 115586 | CAT1    | 0         | 100    |
| AgabiA15p1 5615  | AgabiA15p2 5758  | 200291 | CAT3    | 0         | 100    |
| AgabiA15p1 5438  | AgabiA15p2 5587  | 190684 | CDC5    | 0         | 98.71  |
| AgabiA15p1 3434  | AgabiA15p2 3379  | 121800 | CIPB    | 0         | 97.33  |
| AgabiA15p1 1432  | AgabiA15p2 1515  | 195535 | COX4    | 0         | 100    |
| AgabiA15p1 6236  | AgabiA15p2 6400  | 177982 | CYP63   | 0         | 98.82  |
| AgabiA15p1 7984  | AgabiA15p2 8153  | 135048 | CytC2   | 3.00E-173 | 100    |
| AgabiA15p1 6030  | AgabiA15p2 6190  | 188638 | HMG1    | 0         | 99.21  |
| AgabiA15p1 9296  | AgabiA15p2 9473  | 224131 | Hpt     | 0         | 100    |
| AgabiA15p1 3435  | AgabiA15p2 3380  | 121801 | INH1    | 3.00E-128 | 98.45  |
| AgabiA15p1 4008  | AgabiA15p2 3983  | 221245 | MnP     | 0         | 99.06  |
| AgabiA15p1 2172  | AgabiA15p2 2148  | 226574 | NDE1    | 0         | 100    |
| AgabiA15p1 2932  | AgabiA15p2 2853  | 227697 | NDE2    | 0         | 100    |
| AgabiA15p1 8485  | AgabiA15p2 8625  | 136834 | NUXM    | 0         | 100    |
| AgabiA15p1 4154  | AgabiA15p2 4172  | 192611 | NUZM    | 0         | 98.67  |
| AgabiA15p1 6172  | AgabiA15p2 6334  | 195692 | NdufA1  | 3.00E-123 | 97.29  |
| AgabiA15p1 6031  | AgabiA15p2 6191  | 139455 | NdufA13 | 0         | 100    |
| AgabiA15p1 2905  | AgabiA15p2 2828  | 138930 | NdufA2  | 4.00E-133 | 100    |
| AgabiA15p1 6526  | AgabiA15p2 6695  | 202899 | NdufA4  | 1.00E-122 | 99.58  |
| AgabiA15p1 646   | AgabiA15p2 672   | 189651 | NdufA5  | 0         | 98.97  |
| AgabiA15p1 3259  | AgabiA15p2 3172  | 195108 | NdufA6  | 0         | 99     |
| AgabiA15p1 9358  | AgabiA15p2 9534  | 193806 | NdufA9  | 0         | 99.45  |
| AgabiA15p1 674   | AgabiA15p2 700   | 214389 | NdufB11 | 7.00E-170 | 99.39  |
| AgabiA15p1 10070 | AgabiA15p2 10123 | 208065 | NdufB7  | 0         | 99.72  |
| AgabiA15p1 6069  | AgabiA15p2 6226  | 139429 | NdufB9  | 2.00E-176 | 99.7   |
| AgabiA15p1 2042  | AgabiA15p2 2023  | 194758 | NdufS1  | 0         | 100    |
| AgabiA15p1 1088  | AgabiA15p2 1111  | 190005 | NdufS3  | 0         | 100    |
| AgabiA15p1 9451  | AgabiA15p2 9621  | 193877 | NdufS4  | 0         | 98.39  |



|                  |                  |        |                                     |           |       |
|------------------|------------------|--------|-------------------------------------|-----------|-------|
| AgabiA15p1 601   | AgabiA15p2 629   | 133027 | NdufS6                              | 0         | 99.03 |
| AgabiA15p1 4161  | AgabiA15p2 4179  | 192620 | NdufS7                              | 0         | 100   |
| AgabiA15p1 6033  | AgabiA15p2 6193  | 188636 | NdufS8                              | 0         | 99.16 |
| AgabiA15p1 690   | AgabiA15p2 716   | 133109 | Ndufab1                             | 0         | 98.6  |
| AgabiA15p1 3782  | AgabiA15p2 3756  | 135814 | OSCP/ATP5                           | 0         | 99.08 |
| AgabiA15p1 4327  | AgabiA15p2 4346  | 192776 | PAL1                                | 0         | 99.4  |
| AgabiA15p1 4243  | AgabiA15p2 4260  | 192690 | PAL2                                | 0         | 99.63 |
| AgabiA15p1 3454  | AgabiA15p2 3399  | 210545 | QCR2                                | 0         | 98.58 |
| AgabiA15p1 2199  | AgabiA15p2 2174  | 138465 | QCR8                                | 1.00E-161 | 100   |
| AgabiA15p1 6694  | AgabiA15p2 6862  | 116951 | RIM15                               | 0         | 99.31 |
| AgabiA15p1 3383  | AgabiA15p2 3330  | 195170 | SDH4                                | 0         | 98.02 |
| AgabiA15p1 6899  | AgabiA15p2 7121  | 149788 | SSK1                                | 0         | 100   |
| AgabiA15p1 869   | AgabiA15p2 896   | 114317 | STK/HK                              | 0         | 100   |
| AgabiA15p1 1449  | AgabiA15p2 1531  | 228355 | Tco1                                | 0         | 100   |
| AgabiA15p1 8256  | AgabiA15p2 8388  | 143539 | Tco5                                | 0         | 100   |
| AgabiA15p1 7003  | AgabiA15p2 7226  | 230069 | c2h2                                | 0         | 99.86 |
| AgabiA15p1 4651  | AgabiA15p2 4717  | 203612 | frt2                                | 0         | 97.08 |
| AgabiA15p1 9024  | AgabiA15p2 9205  | 223670 | fst4                                | 0         | 98.9  |
| AgabiA15p1 4515  | AgabiA15p2 4547  | 192934 | geranylgeranyl diphosphate synthase | 0         | 97.73 |
| AgabiA15p1 4280  | AgabiA15p2 4297  | 192725 | hom2                                | 0         | 99.28 |
| AgabiA15p1 5529  | AgabiA15p2 5676  | 190759 | hspA                                | 0         | 99.62 |
| AgabiA15p1 4376  | AgabiA15p2 4397  | 192819 | hspC                                | 0         | 99.3  |
| AgabiA15p1 3389  | AgabiA15p2 3335  | 195173 | hspD                                | 0         | 98.77 |
| AgabiA15p1 10959 | AgabiA15p2 10986 | 120944 | lcc10                               | 0         | 91.17 |
| AgabiA15p1 4698  | AgabiA15p2 4766  | 184993 | lcc12                               | 0         | 98.61 |
| AgabiA15p1 1413  | AgabiA15p2 1497  | 139148 | lcc2                                | 0         | 100   |
| AgabiA15p1 4686  | AgabiA15p2 4752  | 184981 | lcc3                                | 0         | 99.89 |
| AgabiA15p1 10961 | AgabiA15p2 10987 | 194714 | lcc9                                | 0         | 85.85 |
